# Supplementary material for: Early-life and pubertal stress differentially modulate grey matter development in human adolescents
Source: PubMed Central journal article supplement (PMC6003940; doi:10.1038/s41598-018-27439-5), 2018-06-15
Supplement: 41598_2018_27439_MOESM1_ESM.pdf [file 41598_2018_27439_MOESM1_ESM.pdf]

**Manuscript Title:** Early-life and pubertal stress differentially modulate grey matter development in human adolescents

**Authors:** Anna Tyborowska<sup>a,b\*</sup>, Inge Volman<sup>c</sup>, Hannah C. M. Niermann<sup>a,b</sup>, J. Loes Pouwels<sup>a</sup>, Sanny Smeekens<sup>a,d</sup>, Antonius H. N. Cillessen<sup>a</sup>, Ivan Toni<sup>b^</sup>, Karin Roelofs<sup>a,b^</sup>

Table S1. Effects of **Personal Early-Life Events** on grey matter volume changes between ages 14 and 17.

| Anatomical Region     | Side | BA | k     | x  | y  | z   | P <sub>FWE</sub> | TFCE | Mean parameter estimates per category |                      |                       |
|-----------------------|------|----|-------|----|----|-----|------------------|------|---------------------------------------|----------------------|-----------------------|
|                       |      |    |       |    |    |     |                  |      | 0                                     | 1                    | +2                    |
| Anterior Insula       | R    | 48 | 29243 | 38 | 14 | 0   | .005             | 3006 | 0.0017                                | -0.0005              | -0.0030               |
|                       |      | 48 |       | 39 | 18 | -2  | .005             | 2979 | 0.0005                                | -0.0009              | -0.0048               |
| Putamen               | R    |    |       | 26 | 2  | 8   | .008             | 2751 | 0.0008                                | 0.0003               | -0.0021               |
|                       |      |    |       | 21 | 3  | 9   | .008             | 2749 | 0.0008                                | 0.0004               | -0.0012               |
| Insula                | R    | 48 |       | 44 | 0  | 8   | .008             | 2739 | -0.0006                               | -0.0018              | -0.0036               |
| Putamen               | R    |    |       | 16 | 12 | 0   | .009             | 2646 | 0.0010                                | 0.4x10 <sup>-4</sup> | -0.0024               |
| Thalamus/Pallidum     | R    |    |       | 15 | -2 | 2   | .009             | 2644 | 0.9x10 <sup>-4</sup>                  | 0.9x10 <sup>-4</sup> | -0.9x10 <sup>-4</sup> |
| Middle temporal gyrus | R    | 21 |       | 57 | 3  | -18 | .009             | 2621 | -0.0012                               | -0.0024              | -0.0053               |

|                       |   |       |     |     |     |      |      |                      |                       |         |
|-----------------------|---|-------|-----|-----|-----|------|------|----------------------|-----------------------|---------|
|                       |   | 21    | 62  | -4  | -22 | .011 | 2501 | -0.0020              | -0.0024               | -0.0051 |
| Orbitofrontal cortex  | R | 47    | 44  | 45  | -15 | .012 | 2459 | -0.0007              | -0.0017               | -0.0055 |
| Parahippocampal Gyrus | L | 28/34 | -12 | -2  | -16 | .012 | 2435 | 0.0018               | 0.0007                | -0.0018 |
| Putamen               | L |       | -26 | -10 | 8   | .012 | 2433 | 0.0001               | -0.3x10 <sup>-4</sup> | -0.0004 |
| Thalamus              | L |       | -21 | -12 | 6   | .012 | 2431 | 0.4x10 <sup>-4</sup> | 0.6x10 <sup>-5</sup>  | -0.0001 |
| Amygdalae             | R | 34    | 22  | -2  | -18 | .012 | 2429 | 0.0051               | 0.0047                | -0.0009 |
|                       | L | 34/25 | -12 | 3   | -14 | .012 | 2429 | 0.0024               | -0.0011               | -0.0031 |
| Thalamus              | R |       | 9   | -3  | 0   | .013 | 2397 | 0.0008               | 0.0006                | -0.0002 |
| Putamen               | L |       | -22 | -8  | 15  | .013 | 2376 | 0.2x10 <sup>-4</sup> | -0.2x10 <sup>-4</sup> | -0.0002 |
|                       |   |       | -26 | 2   | 4   | .013 | 2371 | 0.0016               | -0.0007               | -0.0032 |
| Caudate               | L |       | -8  | 15  | -4  | .013 | 2368 | -0.0001              | -0.001                | -0.0063 |
| Amygdala              | R | 34    | 27  | 6   | -20 | .013 | 2357 | 0.0047               | 0.0044                | -0.0035 |
| Olfactory cortex      | L | 25    | -2  | 6   | -12 | .014 | 2346 | 0.0023               | -0.0002               | -0.0023 |
| Temporal pole         | R | 38    | 48  | 9   | -20 | .015 | 2338 | -0.0007              | -0.0013               | -0.0028 |
| Anterior insula       | R | 48    | 33  | 10  | -14 | .015 | 2336 | 0.0043               | 0.0019                | -0.0010 |
| Temporal pole         | R | 38    | 44  | 10  | -18 | .015 | 2327 | -0.0002              | -0.0009               | -0.0028 |
|                       |   | 38    | 34  | 10  | -20 | .016 | 2305 | 0.0029               | 0.0004                | -0.0037 |

|                               |     |       |      |     |    |     |      |      |                       |         |         |
|-------------------------------|-----|-------|------|-----|----|-----|------|------|-----------------------|---------|---------|
| Inferior frontal gyrus        | R   | 48/45 |      | 51  | 20 | 9   | .016 | 2297 | -0.0021               | -0.0015 | -0.0036 |
| Olfactory                     | R   | 38    |      | 2   | 14 | -6  | .016 | 2295 | 0.6x10 <sup>-4</sup>  | -0.0011 | -0.0037 |
| Frontal pole                  | R   | 11    |      | 28  | 54 | -10 | .016 | 2266 | -0.2x10 <sup>-4</sup> | -0.0017 | -0.0040 |
| Rolandic operculum            | R   | 48    |      | 57  | 6  | 8   | .016 | 2263 | -0.0006               | -0.0011 | -0.0028 |
| Frontal pole                  | R   | 11    |      | 27  | 48 | -8  | .016 | 2259 | -0.0001               | -0.0009 | -0.0018 |
| Inferior frontal gyrus        | R   | 47    |      | 42  | 46 | 0   | .016 | 2258 | -0.0038               | -0.0035 | -0.0065 |
| Orbitofrontal cortex          | R   | 47/11 |      | 24  | 42 | -4  | .016 | 2257 | -0.6x10 <sup>-4</sup> | -0.0002 | -0.0004 |
| Middle frontal gyrus          | L   | 47/46 | 5490 | -26 | 46 | 9   | .022 | 2044 | -0.0021               | -0.0027 | -0.0049 |
| Frontal pole                  | L   | 11    |      | -20 | 62 | -9  | .029 | 1852 | -0.0014               | -0.0021 | -0.0060 |
| Superior frontal gyrus        | L   | 11    |      | -18 | 51 | 3   | .029 | 1837 | -0.0006               | -0.0012 | -0.0017 |
| Anterior cingulate cortex     | L/R | 10    |      | 0   | 48 | 3   | .031 | 1813 | -0.0017               | -0.0022 | -0.0046 |
|                               | R   | 24    |      | 3   | 39 | 15  | .031 | 1809 | -0.0002               | -0.0018 | -0.0040 |
| Orbitofrontal cortex          | L   | 47    |      | -46 | 36 | -14 | .031 | 1802 | -0.0015               | -0.0030 | -0.0058 |
| Anterior cingulate cortex     | L   | 10    |      | -9  | 50 | 2   | .032 | 1781 | -0.0021               | -0.0036 | -0.0051 |
| Medial superior frontal gyrus | L   | 10    |      | -10 | 63 | 8   | .032 | 1779 | -0.0006               | -0.0016 | -0.0039 |
| Inferior frontal gyrus        | L   | 47    |      | -40 | 34 | 2   | .032 | 1778 | -0.0015               | -0.0018 | -0.0027 |
|                               | L   | 45    |      | -40 | 28 | 12  | .032 | 1776 | -0.0031               | -0.0032 | -0.0047 |

|                               |   |       |     |    |    |      |      |         |                      |                       |
|-------------------------------|---|-------|-----|----|----|------|------|---------|----------------------|-----------------------|
| Medial superior frontal gyrus | R | 10    | 2   | 62 | 6  | .032 | 1775 | -0.0018 | -0.0030              | -0.0040               |
|                               | R | 10    | 3   | 57 | 6  | .032 | 1774 | -0.0015 | -0.0035              | -0.0046               |
|                               | R | 10    | 8   | 63 | 15 | .032 | 1771 | -0.0010 | -0.0029              | -0.0055               |
| Superior frontal gyrus        | R | 10    | 15  | 64 | 18 | .032 | 1770 | 0.0006  | -0.0003              | -0.9x10 <sup>-4</sup> |
| Medial superior frontal gyrus | L | 10    | -2  | 64 | 18 | .032 | 1767 | -0.0018 | -0.0026              | -0.0036               |
|                               | R | 10    | 4   | 62 | 10 | .032 | 1767 | -0.0013 | -0.0030              | -0.0048               |
|                               | R | 10    | 3   | 66 | 10 | .032 | 1767 | -0.0012 | -0.0023              | -0.0038               |
| Inferior frontal gyrus        | L | 45    | -54 | 28 | 15 | .033 | 1758 | -0.0023 | -0.0023              | -0.0050               |
| Anterior cingulate cortex     | R | 24    | 2   | 32 | 15 | .033 | 1754 | 0.0011  | 0.6x10 <sup>-4</sup> | -0.0021               |
| Inferior frontal gyrus        | L | 45    | -48 | 28 | 15 | .033 | 1750 | -0.0042 | -0.0032              | -0.0062               |
| Middle frontal gyrus          | L | 10/46 | -28 | 57 | 14 | .034 | 1748 | -0.0043 | -0.0051              | -0.0067               |
| Inferior frontal gyrus        | L | 45    | -56 | 27 | 10 | .035 | 1736 | -0.0024 | -0.0017              | -0.0048               |
| Orbitofrontal cortex          | L | 45/47 | -45 | 40 | -2 | .036 | 1716 | -0.0026 | -0.0042              | -0.0060               |
| Medial orbitofrontal cortex   | R | 11    | 4   | 40 | -9 | .037 | 1708 | -0.0010 | -0.0041              | -0.0047               |
|                               | R | 11    | 0   | 44 | -9 | .037 | 1706 | -0.0017 | -0.0054              | -0.0056               |
| Superior frontal gyrus        | L | 10    | -14 | 66 | 15 | .038 | 1684 | -0.0021 | -0.0029              | -0.0052               |
|                               | R | 10/46 | 24  | 62 | 22 | .039 | 1662 | -0.0021 | -0.0045              | -0.0051               |

|                            |   |       |      |     |     |    |      |      |                       |         |         |
|----------------------------|---|-------|------|-----|-----|----|------|------|-----------------------|---------|---------|
|                            | L | 10    |      | -18 | 62  | 22 | .043 | 1616 | -0.0032               | -0.0038 | -0.0047 |
|                            | R | 10    |      | 27  | 62  | 18 | .045 | 1591 | -0.0023               | -0.0048 | -0.0055 |
| Medial orbitofrontal gyrus | R | 11    |      | 2   | 64  | -3 | .048 | 1568 | -0.0016               | -0.0027 | -0.0033 |
| Middle occipital gyrus     | R | 19    | 2111 | 39  | -72 | 0  | .032 | 1797 | -0.0004               | -0.0014 | -0.0025 |
|                            | R | 19    |      | 32  | -70 | 0  | .032 | 1781 | -0.8x10 <sup>-4</sup> | -0.0002 | -0.0004 |
| Inferior temporal gyrus    | R | 19/37 |      | 44  | -69 | -4 | .036 | 1725 | -0.0018               | -0.0031 | -0.0045 |
|                            | R | 37    |      | 52  | -66 | -6 | .037 | 1703 | -0.0032               | -0.0036 | -0.0062 |
| Middle temporal gyrus      | R | 21    |      | 50  | -46 | 12 | .037 | 1699 | -0.0038               | -0.0043 | -0.0056 |
| Fusiform gyrus             | R | 19/37 |      | 32  | -64 | -4 | .038 | 1680 | -0.0004               | -0.0009 | -0.0011 |
| Middle temporal gyrus      | R | 37    |      | 54  | -57 | 6  | .040 | 1651 | -0.0030               | -0.0033 | -0.0058 |
| Middle occipital gyrus     | R | 18/19 |      | 36  | -84 | 4  | .040 | 1646 | -0.0020               | -0.0026 | -0.0032 |
| Superior temporal gyrus    | R | 41    |      | 40  | -36 | 10 | .041 | 1632 | -0.0012               | -0.0015 | -0.0024 |
|                            | R | 41    |      | 42  | -40 | 8  | .042 | 1625 | -0.0027               | -0.0036 | -0.0048 |
| Middle temporal gyrus      | R | 37    |      | 45  | -58 | 8  | .045 | 1591 | -0.0031               | -0.0029 | -0.0049 |
| Inferior occipital gyrus   | L | 19    | 317  | -34 | -74 | -8 | .033 | 1749 | -0.0005               | -0.0016 | -0.0023 |
| Post cingulate cortex      | R | 23    | 1273 | 3   | -36 | 28 | .034 | 1746 | -0.0033               | -0.0042 | -0.0071 |
|                            | L | 23    |      | -8  | -30 | 30 | .034 | 1722 | -0.0013               | -0.0015 | -0.0023 |

|                         |     |        |      |     |     |    |      |      |         |         |         |
|-------------------------|-----|--------|------|-----|-----|----|------|------|---------|---------|---------|
|                         | R   | 26     |      | 10  | -42 | 22 | .038 | 1687 | -0.0003 | -0.0006 | -0.0016 |
| Medial parietal cortex  | R   | 26/29  |      | 8   | -44 | 20 | .038 | 1686 | -0.0012 | -0.0016 | -0.0032 |
| Post cingulate cortex   | R   | 23/26  |      | 9   | -40 | 27 | .038 | 1684 | -0.0013 | -0.0020 | -0.0033 |
| Calcarine gyrus         | L   | 17     |      | -10 | -60 | 9  | .044 | 1610 | -0.0027 | -0.0033 | -0.0040 |
| Medial parietal cortex  | L   | 30     |      | -2  | -56 | 16 | .045 | 1590 | -0.0043 | -0.0058 | -0.0069 |
| Middle cingulate cortex | R/L | 23     |      | 0   | -20 | 36 | .046 | 1581 | -0.0056 | -0.0052 | -0.0068 |
| Medial parietal cortex  | L   | 7      | 1260 | -8  | -64 | 44 | .040 | 1648 | -0.0016 | -0.0032 | -0.0049 |
|                         | L   | 7      |      | -14 | -63 | 42 | .041 | 1635 | -0.0005 | -0.0016 | -0.0022 |
| Postcentral sulcus      | L   | 2/7/40 |      | -24 | -39 | 40 | .041 | 1632 | -0.0003 | -0.0004 | -0.0007 |
| Postcentral sulcus      | L   | 2/7/40 |      | -26 | -39 | 36 | .042 | 1629 | -0.0002 | -0.0003 | -0.0006 |
| Medial parietal cortex  | R   | 7      |      | 3   | -68 | 39 | .042 | 1625 | -0.0029 | -0.0041 | -0.0058 |
|                         | L   | 23     |      | -9  | -57 | 27 | .043 | 1616 | -0.0028 | -0.0034 | -0.0049 |
| Intraparietal sulcus    | L   | 7/40   |      | -26 | -45 | 32 | .044 | 1612 | -0.0001 | -0.0002 | -0.0004 |
|                         | L   | 7/40   |      | -21 | -52 | 36 | .044 | 1611 | -0.0003 | -0.0005 | -0.0006 |
|                         | L   | 7/40   |      | -26 | -50 | 32 | .044 | 1608 | -0.0002 | -0.0003 | -0.0004 |
| Medial parietal cortex  | L   | 7      |      | -9  | -68 | 34 | .044 | 1600 | -0.0024 | -0.0035 | -0.0042 |
| Cuneus                  | L   | 7/19   |      | -12 | -75 | 36 | .045 | 1597 | -0.0015 | -0.0021 | -0.0044 |

---

|                         |   |       |     |     |     |     |      |      |         |         |         |
|-------------------------|---|-------|-----|-----|-----|-----|------|------|---------|---------|---------|
| Postcentral gyrus       | L | 40    |     | -36 | -35 | 46  | .046 | 1580 | -0.0040 | -0.0038 | -0.0060 |
| Cuneus                  | L | 18/19 |     | -9  | -80 | 30  | .048 | 1571 | 0.0002  | -0.0007 | -0.0021 |
| Middle temporal gyrus   | L | 37    | 260 | -45 | -58 | 9   | .044 | 1607 | -0.0018 | -0.0030 | -0.0047 |
| Middle occipital gyrus  | L | 39    |     | -33 | -70 | 15  | .048 | 1570 | -0.0011 | -0.0009 | -0.0019 |
| Middle occipital gyrus  | L | 19/37 |     | -38 | -74 | 12  | .048 | 1567 | -0.0018 | -0.0017 | -0.0031 |
| Inferior temporal gyrus | R | 20    | 14  | 56  | -14 | -34 | .047 | 1574 | -0.0036 | -0.0016 | -0.0053 |
| Supramarginal gyrus     | R | 48    | 42  | 50  | -39 | 32  | .049 | 1560 | -0.0019 | -0.0023 | -0.0039 |
| Superior temporal gyrus | R | 42    | 5   | 57  | -33 | 20  | .050 | 1551 | -0.0011 | -0.0003 | -0.0026 |

BA, Brodmann Area; k, number of voxels in a cluster;  $p_{FWE}$ , combined peak-cluster level value; TFCE, threshold free cluster enhancement statistic; R, right; L, left.

Note: Mean parameter estimates are split into categories of 0, 1, 2 or more early-life events for interpretational purposes. Table presents clusters' local maxima more than 4 mm apart.

Table S2. Effects of **Peer Environment** on grey matter volume changes between ages 14 and 17.

| Anatomical Region      | Side | BA | k     | x   | y   | z   | p <sub>FWE</sub> | TFCE | Mean parameter estimates per category |                      |                       |
|------------------------|------|----|-------|-----|-----|-----|------------------|------|---------------------------------------|----------------------|-----------------------|
|                        |      |    |       |     |     |     |                  |      | Liked                                 | Mixed                | Disliked              |
| Fusiform gyrus         | R    | 37 | 631   | 32  | -42 | -9  | .013             | 2446 | -0.0056                               | -0.0027              | -0.0007               |
| Parahippocampal gyrus  | R    | 20 |       | 32  | -22 | -21 | .039             | 1727 | -0.0009                               | 0.0010               | 0.0032                |
| Orbitofrontal cortex   | R    | 11 | 14197 | 12  | 60  | -14 | .014             | 2350 | -0.0052                               | -0.0022              | -0.3x10 <sup>-4</sup> |
| Middle frontal gyrus   | R    | 9  |       | 39  | 10  | 50  | .016             | 2290 | -0.0041                               | -0.0035              | -0.0004               |
| Frontal pole           | R    | 11 |       | 28  | 56  | -12 | .016             | 2283 | -0.0057                               | -0.0018              | 0.0005                |
| Middle frontal gyrus   | R    | 9  |       | 33  | 14  | 45  | .017             | 2267 | -0.0026                               | -0.0016              | -0.0003               |
| Precentral gyrus       | R    | 6  |       | 48  | -2  | 39  | .017             | 2263 | -0.0017                               | 0.5x10 <sup>-4</sup> | 0.0011                |
| Middle frontal gyrus   | L    | 9  |       | -36 | 10  | 45  | .017             | 2238 | -0.0046                               | -0.0024              | -0.6x10 <sup>-4</sup> |
| Precentral gyrus       | L    | 6  |       | -30 | 3   | 50  | .018             | 2195 | -0.0041                               | -0.0028              | -0.0010               |
| Superior frontal gyrus | L    | 6  |       | -14 | 14  | 51  | .018             | 2181 | -0.0023                               | -0.0011              | -0.0003               |
| Precentral gyrus       | L    | 6  |       | -44 | 2   | 45  | .018             | 2172 | -0.0063                               | -0.0036              | -0.0008               |
| Superior frontal gyrus | L    | 32 |       | -12 | 34  | 44  | .018             | 2163 | -0.0037                               | -0.0014              | -0.0002               |
|                        | R    | 8  |       | 20  | 14  | 54  | .018             | 2161 | -0.0051                               | -0.0046              | -0.0009               |



|                                               |   |      |     |    |    |      |      |         |         |                       |
|-----------------------------------------------|---|------|-----|----|----|------|------|---------|---------|-----------------------|
| Middle frontal gyrus                          | L | 6/44 | -27 | 9  | 38 | .019 | 2143 | -0.0009 | -0.0007 | -0.0003               |
| Superior frontal gyrus                        | R | 32   | 15  | 26 | 44 | .019 | 2126 | -0.0016 | -0.0014 | -0.0006               |
|                                               | R | 32   | 15  | 27 | 38 | .020 | 2110 | -0.0013 | -0.0009 | -0.0004               |
| Inferior frontal gyrus / Middle frontal gyrus | R | 44   | 44  | 14 | 38 | .020 | 2102 | -0.0056 | -0.0028 | -0.0019               |
| Precentral gyrus                              | R | 44   | 46  | 10 | 36 | .020 | 2101 | -0.0052 | -0.0028 | -0.0022               |
| Superior frontal gyrus                        | R | 9    | 21  | 20 | 32 | .020 | 2097 | -0.0003 | -0.0002 | -0.9x10 <sup>-4</sup> |
|                                               | L | 32   | -12 | 40 | 34 | .020 | 2092 | -0.0024 | -0.0015 | -0.0009               |
|                                               | L | 6    | -18 | 6  | 57 | .021 | 2085 | -0.0049 | -0.0032 | -0.0001               |
|                                               | L | 6    | -22 | 4  | 58 | .021 | 2085 | -0.0062 | -0.0049 | -0.0005               |
| Frontal pole                                  | R | 47   | 40  | 52 | -9 | .021 | 2085 | -0.0058 | -0.0019 | -0.0007               |
| Medial superior frontal gyrus                 | L | 9/32 | -9  | 45 | 33 | .021 | 2076 | -0.0032 | -0.0016 | -0.0012               |
|                                               | L | 32   | -8  | 45 | 26 | .021 | 2072 | -0.0048 | -0.0033 | -0.0015               |
| Supplementary motor area                      | L | 32   | -10 | 22 | 50 | .021 | 2061 | -0.0029 | -0.0015 | -0.0007               |
| Medial superior frontal gyrus                 | R | 9/32 | 9   | 44 | 34 | .021 | 2052 | -0.0037 | -0.0016 | -0.0006               |
| Precentral gyrus                              | L | 6    | -46 | -4 | 39 | .022 | 2033 | -0.0025 | -0.0006 | 0.0002                |
| Anterior cingulate cortex                     | R | 32   | 9   | 32 | 21 | .022 | 2024 | -0.0036 | -0.0023 | -0.0003               |

|                                     |     |       |      |     |     |     |      |      |                       |                       |         |
|-------------------------------------|-----|-------|------|-----|-----|-----|------|------|-----------------------|-----------------------|---------|
| Rectus gyrus                        | L   | 11    |      | -2  | 57  | -15 | .022 | 2024 | -0.0046               | -0.0031               | -0.0020 |
| Anterior cingulate cortex           | R   | 32    |      | 15  | 27  | 20  | .023 | 2013 | -0.0004               | -0.0004               | 0.0001  |
|                                     | R   | 11/32 |      | 12  | 33  | 3   | .023 | 2000 | -0.0004               | -0.8x10 <sup>-4</sup> | 0.0003  |
| Medial orbitofrontal cortex         | R   | 10/11 |      | 2   | 63  | -8  | .023 | 1998 | -0.0039               | -0.0026               | -0.0018 |
| Anterior cingulate cortex           | R   | 25    |      | 8   | 28  | 2   | .024 | 1991 | -0.0004               | -0.0001               | 0.0006  |
| Vermis                              | R/L |       | 1603 | 0   | -63 | -34 | .017 | 2236 | -0.0012               | 0.0012                | 0.0025  |
| Cerebellum                          | R   |       |      | 9   | -74 | -36 | .021 | 2087 | -0.0007               | 0.3x10 <sup>-4</sup>  | 0.0026  |
|                                     | R   |       |      | 14  | -80 | -46 | .028 | 1893 | -0.0026               | -0.0031               | 0.0013  |
| Vermis                              | R   |       |      | 2   | -50 | -28 | .033 | 1799 | 0.3x10 <sup>-4</sup>  | 0.0007                | 0.0013  |
| Cerebellum                          | L   |       |      | -6  | -72 | -30 | .034 | 1788 | -0.0008               | 0.0014                | 0.0028  |
| Vermis                              | R/L |       |      | 0   | -44 | -30 | .049 | 1606 | 0.6x10 <sup>-4</sup>  | 0.0005                | 0.0007  |
| Parahippocampal gyrus               | L   | 27    | 450  | -14 | -33 | -9  | .024 | 1976 | -0.0011               | 0.0004                | 0.0020  |
| Hippocampus / Parahippocampal gyrus | L   | 37    |      | -26 | -36 | -8  | .035 | 1772 | -0.1x10 <sup>-3</sup> | 0.0006                | 0.0026  |
| Middle temporal gyrus               | R   | 37    | 237  | -58 | -66 | 8   | .028 | 1900 | -0.0046               | -0.0021               | -0.0011 |
| Medulla                             | L   |       | 1093 | -2  | -48 | -63 | .029 | 1882 | 0.3x10 <sup>-4</sup>  | 0.0010                | 0.0019  |
| Cerebellum                          | R   |       |      | 10  | -52 | -46 | .029 | 1877 | -0.0012               | 0.0005                | 0.0023  |

|                                 |   |    |     |     |     |      |      |                      |                      |                       |                       |
|---------------------------------|---|----|-----|-----|-----|------|------|----------------------|----------------------|-----------------------|-----------------------|
|                                 | R |    | 3   | -52 | -54 | .029 | 1868 | -0.0015              | -0.0006              | 0.0021                |                       |
|                                 | R |    | 20  | -48 | -39 | .033 | 1801 | 0.3x10 <sup>-4</sup> | 0.7x10 <sup>-4</sup> | 0.0003                |                       |
|                                 | R |    | 36  | -45 | -44 | .033 | 1790 | -0.0002              | -0.0001              | 0.0025                |                       |
|                                 | R |    | 26  | -45 | -40 | .034 | 1780 | 0.0003               | 0.0004               | 0.0011                |                       |
|                                 | R |    | 18  | -44 | -36 | .037 | 1745 | 0.4x10 <sup>-4</sup> | 0.8x10 <sup>-4</sup> | 0.0002                |                       |
|                                 | R |    | 48  | -50 | -46 | .045 | 1641 | -0.0004              | 0.6x10 <sup>-4</sup> | 0.0021                |                       |
|                                 | R |    | 21  | -39 | -28 | .049 | 1601 | -0.0008              | -0.0007              | 0.0009                |                       |
|                                 | R |    | 21  | -39 | -33 | .049 | 1600 | -0.0003              | -0.0002              | 0.0003                |                       |
| Middle frontal gyrus            | L | 47 | 427 | -24 | 39  | 6    | .030 | 1845                 | -0.0002              | -0.0001               | -0.7x10 <sup>-4</sup> |
|                                 | L | 46 |     | -20 | 40  | 15   | .035 | 1760                 | -0.0010              | -0.0007               | -0.0004               |
| Middle temporal gyrus           | L | 21 | 305 | -52 | -44 | 0    | .031 | 1840                 | -0.0063              | -0.0038               | -0.0021               |
| Cerebellum                      | L |    | 631 | -14 | -84 | -34  | .032 | 1817                 | -0.0002              | 0.0008                | 0.0029                |
|                                 | L |    |     | -9  | -81 | -42  | .032 | 1803                 | -0.0019              | -0.0016               | 0.0022                |
|                                 | L |    |     | -15 | -81 | -48  | .033 | 1791                 | -0.0019              | -0.0029               | 0.0017                |
|                                 | L |    |     | -12 | -82 | -45  | .033 | 1789                 | -0.0016              | -0.0020               | 0.0027                |
|                                 | L |    |     | -15 | -93 | -32  | .042 | 1690                 | 0.0002               | -0.2x10 <sup>-4</sup> | 0.0015                |
| Inferior frontal gyrus / Middle | R | 46 | 61  | 40  | 34  | 26   | .045 | 1648                 | -0.0053              | -0.0034               | -0.0019               |

frontal gyrus

|            |   |    |     |     |     |      |      |                      |                      |         |
|------------|---|----|-----|-----|-----|------|------|----------------------|----------------------|---------|
| Putamen    | L | 26 | -28 | -10 | 8   | .048 | 1612 | -0.0008              | $0.5 \times 10^{-4}$ | -0.0001 |
| Cerebellum | R | 8  | 20  | -22 | -30 | .049 | 1598 | $0.8 \times 10^{-4}$ | 0.0020               | 0.0026  |
| Cerebellum | L | 12 | -9  | -50 | -46 | .049 | 1597 | -0.0008              | 0.0002               | 0.0013  |

BA, Brodmann Area; k, number of voxels in a cluster;  $p_{FWE}$ , combined peak-cluster level value; TFCE, threshold free cluster enhancement statistic;

R, right; L, left.

Note: Mean parameter estimates are split into liked (>0.5 on social preference scale), mixed (0 to 0.5 on social preference scale), and disliked (< 0 on social preference scale) for interpretational purposes. Table presents clusters' local maxima more than 4 mm apart.

Table S3. Decreases <sup>a</sup> in grey matter volume between age 14 and 17

| Anatomical Region       | Side | BA    | K    | x   | y   | z   | P <sub>FWE</sub> | TFCE |
|-------------------------|------|-------|------|-----|-----|-----|------------------|------|
| Superior frontal gyrus  | L    | 9     | 135  | -3  | 48  | 38  | .038             | 1283 |
| Superior temporal pole  | L    | 38    | 377  | -46 | 24  | -14 | .031             | 1375 |
| Orbital frontal gyrus   | L    | 38/47 |      | -36 | 18  | -16 | .046             | 1192 |
| Inferior temporal gyrus | L    | 20    | 2142 | -63 | -32 | -20 | .010             | 1904 |
| Middle temporal gyrus   | L    | 20    |      | -51 | -10 | -15 | .026             | 1447 |
|                         | L    | 20    |      | -51 | 2   | -30 | .028             | 1417 |
| Middle temporal gyrus   | L    | 21    | 140  | -63 | -54 | 15  | .041             | 1251 |
|                         | L    | 37    |      | -60 | -62 | 16  | .045             | 1215 |
|                         | L    | 37    |      | -58 | -66 | 8   | .046             | 1203 |

BA, Brodmann Area; k, number of voxels in a cluster; p<sub>FWE</sub>, combined peak-cluster level value; TFCE, threshold free cluster enhancement statistic; R, right; L, left.

Note: Table presents clusters' local maxima more than 8 mm apart.

<sup>a</sup> Controlled for early and current personal life events, parent-child interactions, peer environment, and gender.

Table S4. Increases <sup>a</sup> in grey matter volume between age 14 and 17

| Anatomical Region | Side | BA | K   | x  | y   | z   | P <sub>FWE</sub> | TFCE |
|-------------------|------|----|-----|----|-----|-----|------------------|------|
| Medulla           | L/R  |    | 200 | 0  | -40 | -56 | .016             | 1664 |
| Medulla           | R    |    | 171 | 8  | -34 | -38 | .024             | 1508 |
| Cerebellum        | R    |    |     | 2  | -40 | -38 | .033             | 1369 |
| Pons              | R    |    | 240 | 8  | -15 | -20 | .020             | 1585 |
|                   | R    |    | 32  | 15 | -10 | -33 | .047             | 1236 |
|                   | R    |    | 4   | 9  | -14 | -30 | .040             | 1304 |

BA, Brodmann Area; k, number of voxels in a cluster; p<sub>FWE</sub>, combined peak-cluster level value; TFCE, threshold free cluster enhancement statistic; R, right; L, left.

Note: Table presents clusters' local maxima more than 8 mm apart.

<sup>a</sup> Controlled for early and current life events, early social environment, and gender.

S1. The Dutch version of the Bayley <sup>1</sup> Mental Scale of Infant Development <sup>2</sup> was used to assess the child's level of cognitive functioning at 15 months. Scores are expressed in the standardized Mental Developmental Index (MDI; M = 100; SD = 15). The Peabody Picture Vocabulary Test - Revised <sup>3</sup> was used to measure verbal intelligence at age 5. Like other standard IQ tests, scores are on a scale with a mean of 100 and a standard deviation of 15. Cognitive functioning indices at age 16 were taken from the Teacher Report Form <sup>4</sup> (Dutch version <sup>5</sup>). Answers were scored on a 7-point Likert scale (1 – far below the average, 7 – far above the average). Academic performance is based on the question, “How does he/she perform compared to the rest of the class?”. Learning progress is based on the question, “How does he/she progress with learning?”. Adequate school behavior is based on the question, “How adequately does he/she behave?”

S2. To ensure that the observed effects of early life stress were not related to baseline differences in GMV, we separately tested whether personal early-life events and parent-child interactions were related to GMV intra-subject differences at age 14. Each MR image was checked for artifacts or anatomical abnormalities and alignment to the anterior commissure. The anatomical images were segmented into grey matter, white matter, and CSF in SPM12. DARTEL <sup>6</sup> was used for inter- subject registration of the grey matter images to a group template. The registered images were smoothed (8mm FWHM Gaussian kernel, Jacobian scaled, threshold at 0.2) and transformed into MNI space. The GM images were entered into a multiple regression analysis with standardized scores of personal early-life events and social environment (parent-child interactions) as covariates. Gender and total brain volume (TBV) were entered as covariates of no interest. To minimize boundary effects, a binary mask of the group template was used to exclude voxels outside of the brain. Following previous analyses in the manuscript, TFCE was used to assess statistical significance, with the threshold set to  $p < .05$ , family-wise

error corrected at the whole-brain level. We did not find any significant effects in GMV differences for personal early-life events nor for parent-child interaction scores.

S3. An additional multiple regression analysis was conducted to check for scanner effects. Scanner type (TRIO vs PRISMA) was entered as a condition-specific factor for personal early-life events and social preference. The remainder of the model remained the same (parent-child interactions, personal current life events, gender, and average total brain volume entered as covariates). The effects of personal early-life events remained the same as described in the manuscript. Social preference results remained similar, but with reduced cluster size. As a result, the right anterior cingulate cortex cluster was present at a subthreshold level ( $p_{FWE} = .057$ ). The left hippocampus cluster was no longer present after scanner correction. This finding should therefore be treated tentatively and needs to be replicated in future studies.

## References

1. Bayley, N. *Manual for the Bayley Scales of Infant Development*. (Psychological Corporation, 1969).
2. van der Meulen, B. F. & Smrkovsky, M. *Bayley Ontwikkelingsschalen: Handleiding*. (Swets & Zeitlinger, 1983).
3. Dunn, L. M. & Dunn, L. M. *Peabody Picture Vocabulary Test, revised: Forms L and M*. (American Guidance Service, 1981).
4. Achenbach, T. M. & Rescorla, L. A. *Manual for the ASEBA*. (University of Vermont, Research Center for Children, Youth, and Families, 2001).
5. Verhulst, C., Frank, C., van der Ende, J. & Koolhans, M. *Teacher Report Form voor kinderen 6-18 jaar*. (Sophia Kinderziekenhuis, 2001).
6. Ashburner, J. A fast diffeomorphic image registration algorithm. *Neuroimage* **38**, 95–113 (2007).
